# Supplementary material
Source: publisher figshare collection journal article supplement (https://acs.figshare.com/ndownloader/files/4333399)
Supplement: Supplementary file 1 [file 4333399]

**Supporting Information for**

**Hydrothermal Tm<sup>3+</sup>-Lu<sub>2</sub>O<sub>3</sub> Nanorods  
with Highly Efficient 2 μm Emission**

*Fátima Esteban-Betegón, Carlos Zaldo and Concepción Cascales\**

Fátima Esteban-Betegón, Carlos Zaldo and Concepción Cascales\*

Instituto de Ciencia de Materiales de Madrid, Consejo Superior de Investigaciones Científicas.

c/ Sor Juana Inés de la Cruz, 3. E-28049 Madrid, Spain.

ccascales@icmm.csic.es

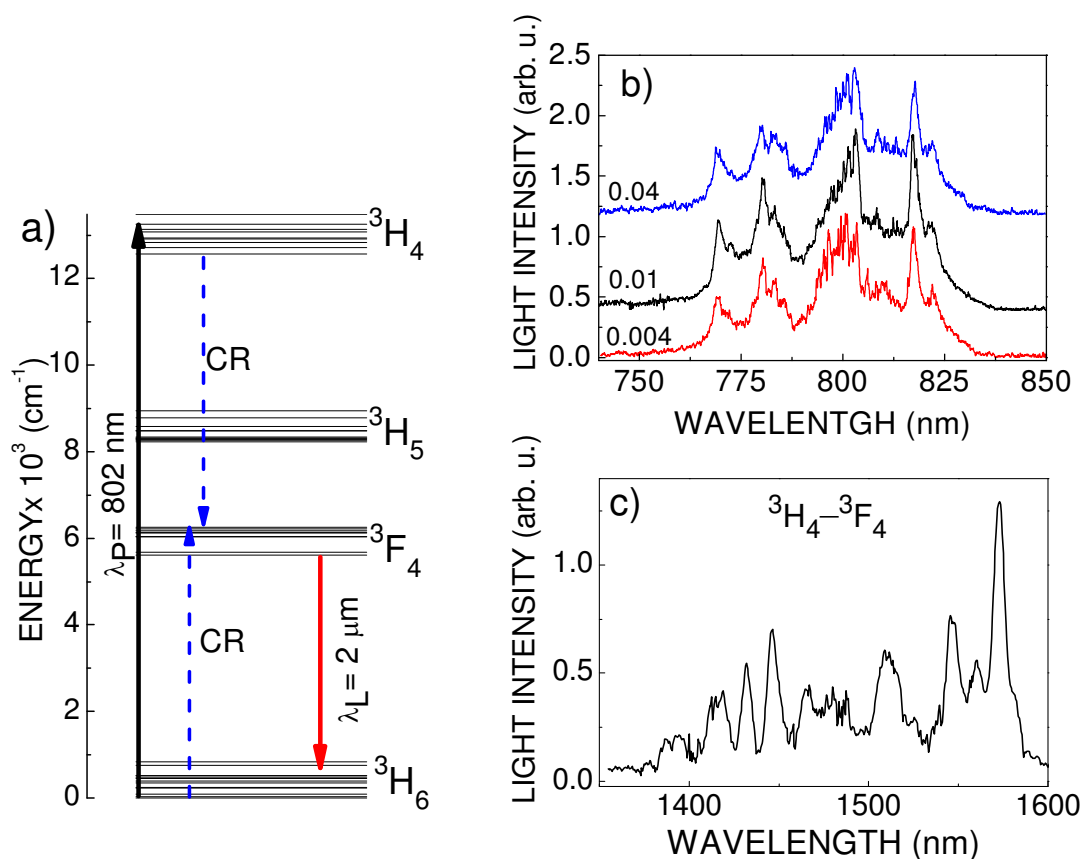

**Figure S1.** (a) Scheme of energy levels of  $\text{Tm}^{3+}$  in  $\text{Lu}_2\text{O}_3$ , showing relevant energy transfer processes for the  ${}^3\text{F}_4 \rightarrow {}^3\text{H}_6$  laser emission operating at  $\sim 2 \mu\text{m}$ .  $\text{Tm}^{3+}$  ions can be efficiently excited around 800 nm through the optical absorption from the  ${}^3\text{H}_6$  ground state to the  ${}^3\text{H}_4$  multiplet. The laser multiplet  ${}^3\text{F}_4$  is populated by a cooperative cross-relaxation (CR) process that occurs through the interaction of two neighboring  $\text{Tm}^{3+}$  ions,  ${}^3\text{H}_4 + {}^3\text{H}_6 \rightarrow 2 \times {}^3\text{F}_4$ , thus the process yields two excited ions for each absorbed pump photon. The efficiency of the CR process depends on the  $\text{Tm}^{3+}$  doping concentration, being very efficient if the Tm-Tm distance is short enough. This laser channel can be directly and efficiently pumped with commercially available powerful semiconductor AlGaAs laser diodes around 800 nm, with little photon energy transferred as heat to the crystal host; (b) 300 K excitation spectrum ( $\lambda_{\text{EMI}}=1962 \text{ nm}$ ) of the  ${}^3\text{H}_4$  multiplet of  $\text{Lu}_{2-x}\text{Tm}_x\text{O}_3$  nanorods; (c) 300 K  ${}^3\text{H}_4 \rightarrow {}^3\text{F}_4$  photoluminescence ( $\lambda_{\text{EXC}}=802 \text{ nm}$ ) spectra of  $\text{Lu}_{1.996}\text{Tm}_{0.004}\text{O}_3$  nanorods.

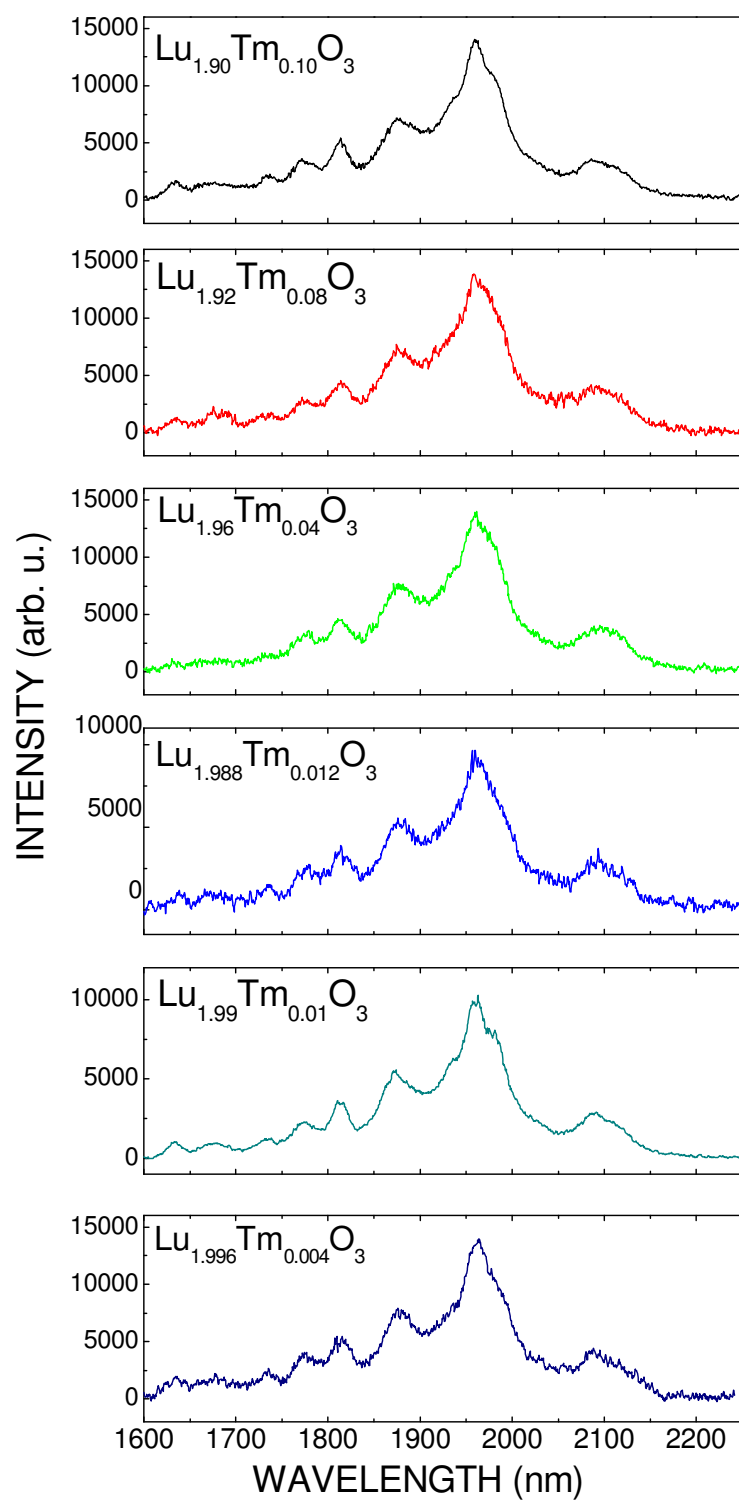

Figure S2. 300 K  $^3\text{F}_4 \rightarrow ^3\text{H}_6$  photoluminescence ( $\lambda_{\text{exc}} = 802$  nm) spectra of  $\text{Lu}_{2-x}\text{Tm}_x\text{O}_3$  nanorods ( $0.004 \leq x \leq 0.1$ ).
